# Supplementary material
Source: publisher site journal article supplement (https://www.dovepress.com/article/579441)
Supplement: Supplementary file 1 [file 579441%20Supplementary%20Material.docx]

| Supplementary Table 1. Information of identified SNPs in exposure (AS) and outcomes (HS). | | | | | | | | | | | | | | | | | | | | |  | |  |
| --- | --- | --- | --- | --- | --- | --- | --- | --- | --- | --- | --- | --- | --- | --- | --- | --- | --- | --- | --- | --- | --- | --- | --- |
| SNP | |  | |  | | Exposure （AS) | | |  | |  | |  | | Outcome (HS) | |  | |  | |  | | F statistics |
| RS ID | | effect_allele | | other_allele | | beta | | | se | | pval | | eaf | | beta | | se | | pval | | eaf | |  |
| rs1020396 | | T | | C | | 0.017447 | | | 0.004243 | | 3.92E-05 | | NA | | -0.0893 | | 0.0706 | | 0.2061 | | 0.5692 | | 16.90865 |
| rs10244904 | | A | | G | | 0.025473 | | | 0.005471 | | 3.22E-06 | | NA | | 0.0278 | | 0.0899 | | 0.757201 | | 0.1849 | | 21.6776 |
| rs10245971 | | T | | G | | 0.029268 | | | 0.006733 | | 1.38E-05 | | NA | | 0.1401 | | 0.1308 | | 0.2841 | | 0.07858 | | 18.88979 |
| rs1041926 | | A | | G | | -0.07483 | | | 0.011692 | | 1.55E-10 | | NA | | -0.3462 | | 0.2336 | | 0.1383 | | 0.9776 | | 40.95401 |
| rs11065898 | | T | | C | | 0.026252 | | | 0.004806 | | 4.71E-08 | | NA | | -0.0152 | | 0.0877 | | 0.8623 | | 0.1966 | | 29.82734 |
| rs11190133 | | T | | C | | -0.03387 | | | 0.004494 | | 4.84E-14 | | NA | | -0.0139 | | 0.0713 | | 0.846 | | 0.3921 | | 56.78141 |
| rs11209026 | | A | | G | | -0.10358 | | | 0.009545 | | 1.94E-27 | | NA | | -0.3756 | | 0.166 | | 0.02367 | | 0.04598 | | 117.7522 |
| rs1128905 | | C | | T | | -0.02372 | | | 0.004095 | | 6.95E-09 | | NA | | -0.1112 | | 0.0695 | | 0.1096 | | 0.503 | | 33.54274 |
| rs11624293 | | C | | T | | 0.042868 | | | 0.006692 | | 1.49E-10 | | NA | | 0.062 | | 0.1275 | | 0.626599 | | 0.08138 | | 41.03188 |
| rs1250550 | | A | | C | | -0.02604 | | | 0.004305 | | 1.46E-09 | | NA | | -0.0895 | | 0.0711 | | 0.208 | | 0.4039 | | 36.57556 |
| rs12615545 | | C | | T | | 0.025473 | | | 0.004173 | | 1.03E-09 | | NA | | -0.045 | | 0.0696 | | 0.5185 | | 0.5123 | | 37.25898 |
| rs130075 | | T | | C | | 0.335829 | | | NA | | 1.00E-200 | | NA | | -0.0405 | | 0.1494 | | 0.7862 | | 0.05767 | | NA |
| rs13327021 | | T | | C | | 0.021859 | | | 0.004232 | | 2.40E-07 | | NA | | 0.0455 | | 0.0729 | | 0.5328 | | 0.3475 | | 26.67885 |
| rs13390874 | | T | | C | | -0.02153 | | | 0.005046 | | 1.98E-05 | | NA | | 0.0637 | | 0.0828 | | 0.4417 | | 0.229 | | 18.20186 |
| rs17233311 | | G | | A | | 0.016841 | | | 0.004145 | | 4.85E-05 | | NA | | -0.0706 | | 0.0716 | | 0.3245 | | 0.6038 | | 16.50229 |
| rs1734907 | | G | | A | | -0.0283 | | | 0.005849 | | 1.31E-06 | | NA | | 0.0893 | | 0.0881 | | 0.3106 | | 0.8108 | | 23.40205 |
| rs17765610 | | G | | A | | 0.035657 | | | 0.006554 | | 5.31E-08 | | NA | | 0.103 | | 0.1393 | | 0.4596 | | 0.06686 | | 29.59399 |
| rs1800682 | | G | | A | | -0.01816 | | | 0.004107 | | 9.74E-06 | | NA | | 0.0139 | | 0.07 | | 0.8429 | | 0.4365 | | 19.55777 |
| rs1801274 | | G | | A | | 0.025318 | | | 0.004177 | | 1.35E-09 | | NA | | -0.0409 | | 0.0694 | | 0.555199 | | 0.5028 | | 36.734 |
| rs1860545 | | A | | G | | -0.02747 | | | 0.004354 | | 2.78E-10 | | NA | | 0.0237 | | 0.0703 | | 0.7364 | | 0.4222 | | 39.81338 |
| rs2058813 | | C | | T | | 0.021632 | | | 0.005108 | | 2.29E-05 | | NA | | 0.1509 | | 0.0996 | | 0.1296 | | 0.8579 | | 17.93136 |
| rs2273684 | | G | | T | | 0.018331 | | | 0.004146 | | 9.80E-06 | | NA | | 0.0584 | | 0.0697 | | 0.4018 | | 0.4909 | | 19.54596 |
| rs2283790 | | G | | A | | 0.02635 | | | 0.004907 | | 7.90E-08 | | NA | | 0.0243 | | 0.0748 | | 0.7452 | | 0.3182 | | 28.82575 |
| rs2402752 | | C | | T | | -0.02276 | | | 0.004519 | | 4.76E-07 | | NA | | -0.0469 | | 0.0841 | | 0.577301 | | 0.2219 | | 25.35365 |
| rs2531875 | | T | | G | | -0.02732 | | | 0.004245 | | 1.22E-10 | | NA | | 0.0454 | | 0.072 | | 0.5285 | | 0.6305 | | 41.42904 |
| rs2663043 | | A | | G | | -0.01882 | | | 0.004111 | | 4.68E-06 | | NA | | -0.0409 | | 0.0705 | | 0.562 | | 0.5686 | | 20.96024 |
| rs27529 | | G | | A | | -0.06204 | | | 0.004299 | | 3.28E-47 | | NA | | -0.0479 | | 0.0729 | | 0.5109 | | 0.6485 | | 208.231 |
| rs2836883 | | A | | G | | -0.03968 | | | 0.004748 | | 6.46E-17 | | NA | | -0.191 | | 0.0808 | | 0.01802 | | 0.2477 | | 69.81901 |
| rs28653390 | | A | | G | | 0.028296 | | | 0.005728 | | 7.82E-07 | | NA | | -0.0395 | | 0.1009 | | 0.6951 | | 0.1365 | | 24.39726 |
| rs35164067 | | A | | G | | -0.03108 | | | 0.00495 | | 3.43E-10 | | NA | | -0.2113 | | 0.0917 | | 0.02119 | | 0.1757 | | 39.40734 |
| rs4129267 | | T | | C | | -0.03077 | | | 0.004226 | | 3.32E-13 | | NA | | -0.0784 | | 0.0764 | | 0.3047 | | 0.297 | | 52.99826 |
| rs41299637 | | G | | T | | -0.03905 | | | 0.00491 | | 1.81E-15 | | NA | | -0.3006 | | 0.0857 | | 0.000456 | | 0.2126 | | 63.2467 |
| rs4672505 | | G | | A | | -0.05978 | | | 0.004151 | | 5.14E-47 | | NA | | -0.0134 | | 0.0734 | | 0.8552 | | 0.6611 | | 207.3354 |
| rs4676410 | | A | | G | | 0.028101 | | | 0.004902 | | 9.90E-09 | | NA | | 0.2194 | | 0.0784 | | 0.005146 | | 0.271 | | 32.85496 |
| rs4851529 | | A | | G | | -0.02255 | | | 0.00424 | | 1.04E-07 | | NA | | -0.0257 | | 0.0718 | | 0.7198 | | 0.5972 | | 28.2899 |
| rs55957767 | | T | | C | | -0.02194 | | | 0.00456 | | 1.50E-06 | | NA | | -0.0333 | | 0.0802 | | 0.677801 | | 0.2538 | | 23.14617 |
| rs639324 | | C | | T | | 0.01847 | | | 0.004442 | | 3.22E-05 | | NA | | 0.0127 | | 0.0772 | | 0.8694 | | 0.7087 | | 17.2822 |
| rs6547632 | | G | | A | | 0.017248 | | | 0.004205 | | 4.10E-05 | | NA | | 0.0464 | | 0.0727 | | 0.5231 | | 0.6417 | | 16.82343 |
| rs6556416 | | C | | A | | 0.025215 | | | 0.0046 | | 4.22E-08 | | NA | | 0.1434 | | 0.0805 | | 0.074981 | | 0.7445 | | 30.03929 |
| rs6600247 | | C | | T | | 0.032833 | | | 0.004151 | | 2.58E-15 | | NA | | -0.1449 | | 0.07 | | 0.03861 | | 0.5386 | | 62.55532 |
| rs6879529 | | A | | G | | -0.02163 | | | 0.004214 | | 2.85E-07 | | NA | | 0.1514 | | 0.0704 | | 0.03147 | | 0.4265 | | 26.3412 |
| rs7191548 | | C | | T | | 0.024985 | | | 0.004285 | | 5.51E-09 | | NA | | -0.0123 | | 0.0704 | | 0.8614 | | 0.4593 | | 33.99381 |
| rs73530203 | | A | | G | | 0.018233 | | | 0.004393 | | 3.32E-05 | | NA | | 0.0118 | | 0.071 | | 0.8684 | | 0.3952 | | 17.22314 |
| rs7374183 | | A | | G | | 0.019489 | | | 0.004177 | | 3.07E-06 | | NA | | -0.019 | | 0.0729 | | 0.7938 | | 0.6386 | | 21.76753 |
| rs7933433 | | T | | G | | 0.020685 | | | 0.004268 | | 1.26E-06 | | NA | | -0.0838 | | 0.0798 | | 0.2935 | | 0.2598 | | 23.47925 |
| rs7954567 | | A | | G | | 0.023912 | | | 0.004526 | | 1.27E-07 | | NA | | 0.0205 | | 0.0733 | | 0.7801 | | 0.3529 | | 27.90247 |
| rs9033 | | G | | A | | 0.017447 | | | 0.004148 | | 2.60E-05 | | NA | | 0.005 | | 0.0702 | | 0.9436 | | 0.4636 | | 17.68436 |
| rs9901869 | | A | | G | | 0.031904 | | | 0.004089 | | 6.04E-15 | | NA | | 0.0973 | | 0.0694 | | 0.1612 | | 0.4906 | | 60.8784 |
| Footnotes: AS:ankylosing spondylitis, HS: hidradenitis suppurativa  Supplementary Table 2. Information of identified SNPs in exposure (HS) and outcomes (AS). | | | | | | | | | | | | | | | | | | | | | |
| SNP |  | |  | | Exposure （AS) | |  |  | |  | | Outcome (HS) | |  | |  | |  | | F statistics | |
| RS ID | effect_allele | | other_allele | | beta | | se | pval | | eaf | | beta | | se | | pval | | eaf | |  | |
| rs11714468 | G | | C | | -0.2955 | | 0.0713 | 3.43E-05 | | 0.4085 | | 1.95E-05 | | 0.000115 | | 0.87 | | 0.373278 | | 17.17639 | |
| rs12536243 | A | | G | | 0.3197 | | 0.0739 | 1.5E-05 | | 0.3394 | | -0.0002 | | 0.00012 | | 0.092001 | | 0.306521 | | 18.71511 | |
| rs1549105 | C | | T | | -0.3319 | | 0.0757 | 1.16E-05 | | 0.6859 | | -1.8E-05 | | 0.000113 | | 0.88 | | 0.604905 | | 19.22289 | |
| rs1592813 | C | | T | | 0.3371 | | 0.0786 | 1.78E-05 | | 0.2918 | | 2.7E-05 | | 0.000122 | | 0.82 | | 0.305339 | | 18.39367 | |
| rs35691190 | T | | A | | -0.3112 | | 0.0746 | 3.04E-05 | | 0.3268 | | -0.00013 | | 0.000112 | | 0.25 | | 0.410365 | | 17.40193 | |
| rs361755 | C | | G | | 0.2965 | | 0.0727 | 4.5E-05 | | 0.4307 | | 5.86E-05 | | 0.000115 | | 0.61 | | 0.521469 | | 16.63323 | |
| rs4758368 | C | | T | | -0.3112 | | 0.073 | 2.01E-05 | | 0.3595 | | 5.21E-05 | | 0.000115 | | 0.649999 | | 0.35428 | | 18.17311 | |
| rs4800194 | G | | A | | -0.3474 | | 0.0703 | 7.67E-07 | | 0.5421 | | -0.00016 | | 0.000111 | | 0.14 | | 0.564372 | | 24.41996 | |
| rs4906129 | A | | C | | -0.3024 | | 0.0724 | 2.94E-05 | | 0.6292 | | 0.000183 | | 0.000114 | | 0.11 | | 0.620044 | | 17.44546 | |
| rs553103 | C | | G | | 0.3013 | | 0.0721 | 2.97E-05 | | 0.376 | | -1E-05 | | 0.000115 | | 0.93 | | 0.363234 | | 17.46319 | |
| rs590937 | C | | T | | 0.4062 | | 0.0951 | 1.93E-05 | | 0.4178 | | 8.96E-05 | | 0.00011 | | 0.42 | | 0.465697 | | 18.24377 | |
| rs639108 | T | | C | | 0.2953 | | 0.0704 | 2.74E-05 | | 0.4748 | | 0.00017 | | 0.000111 | | 0.13 | | 0.465903 | | 17.59452 | |
| rs7625853 | G | | T | | 0.3008 | | 0.0719 | 2.87E-05 | | 0.6063 | | -2E-05 | | 0.000113 | | 0.86 | | 0.596406 | | 17.50225 | |

Footnotes: AS:ankylosing spondylitis, HS: hidradenitis suppurativa

Supplementary Figure 1. AS-HS funnel plot


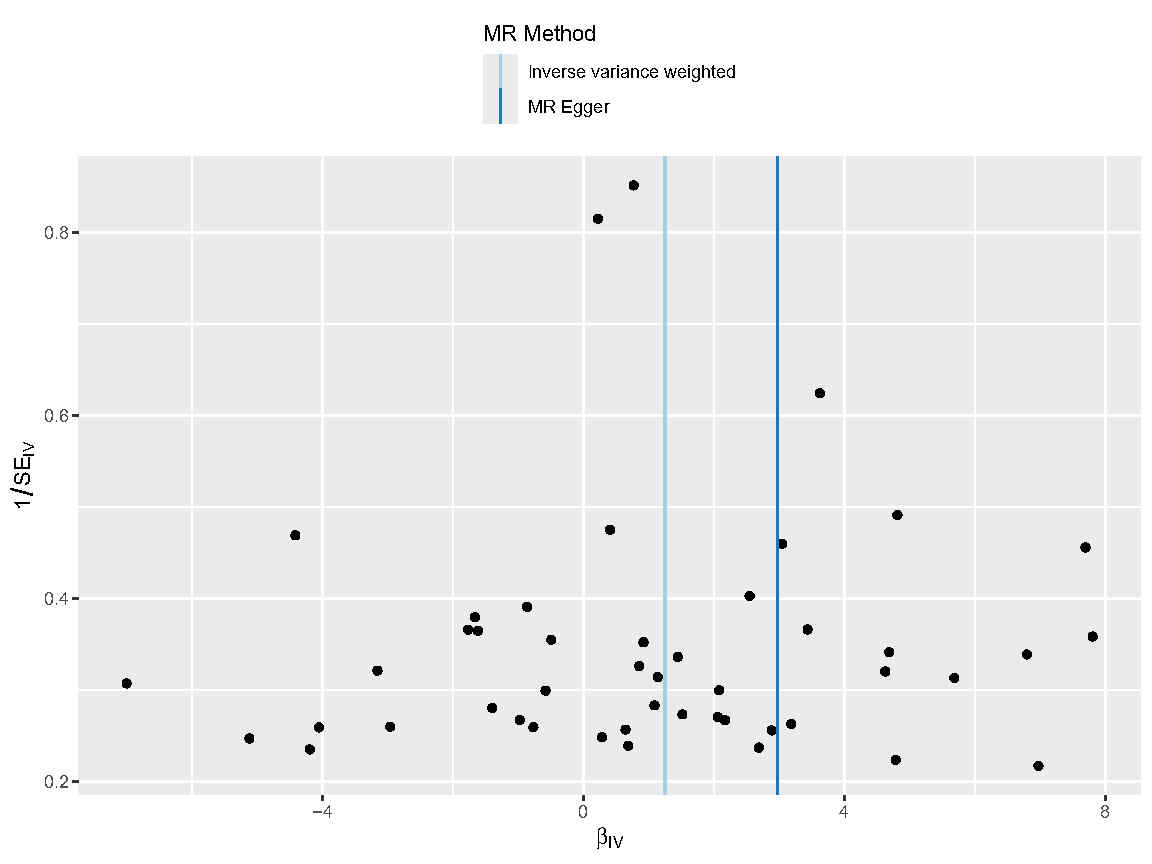


Supplementary Figure 2. HS-AS funnel plot


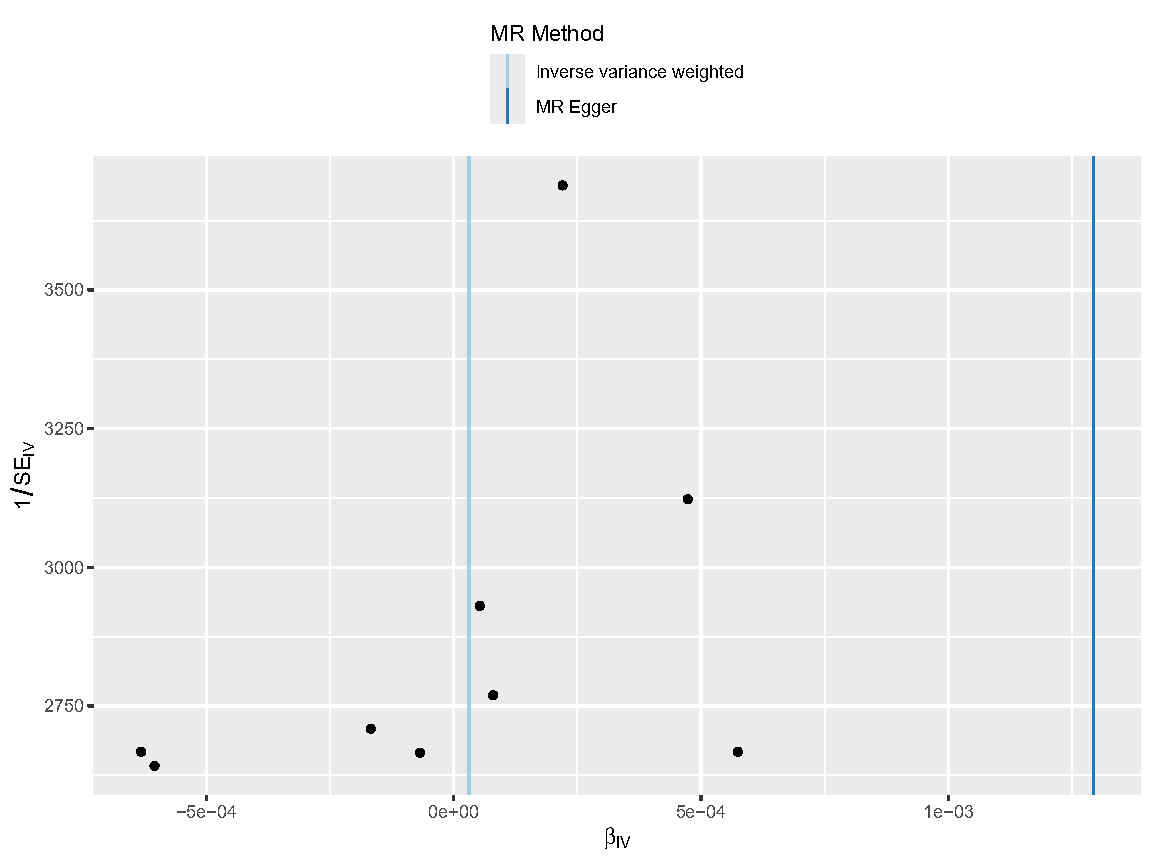


Supplementary Note 1

Estimation Approach

1. Per-SD Risk Increase:

- Formula: OR_per_SD = exp(ln(OR)/SD)

- Assumptions:

SD=1.3 (PLINK-normalized PRS distribution

*Study-derived OR=3.49

- Calculation: exp(ln(3.49)/1.3) ≈ 2.38

2. Attributable Patient Proportion Calculation

• Baseline HS prevalence: 1-4% (reference value from literature [2])

• Expected prevalence in AS patients: 1-4% × 3.49 ≈ 3.5-14%

• Attributable fraction: (3.5-14%) - (1-4%) ≈ 2-10%）
